# Supplementary material for: An ultrasensitive self-driven broadband photodetector based on a 2D-WS2/GaAs type-II Zener heterojunction
Source: Royal Society of Chemistry journal article supplement (doi:10.1039/c9nr10348a), 2020-01-01
Supplement: c9nr10348a1.pdf [file c9nr10348a1.pdf]

## Supporting Information

### **Ultrasensitive self-driven broadband photodetector based on 2D- WS<sub>2</sub>/GaAs type-II Zener heterojunction**

Cheng Jia,<sup>a</sup> Xiaowen Huang,<sup>b</sup> Di Wu,<sup>\*a</sup> Yongzhi Tian,<sup>a</sup> Jiawen Guo,<sup>a</sup> Zhihui Zhao,<sup>a</sup>  
Zhifeng Shi,<sup>a</sup> Yongtao Tian,<sup>a</sup> Xinjian Li,<sup>\*a</sup> and Jiansheng Jie<sup>d</sup>

<sup>a</sup>Key Laboratory of Materials Physics of Ministry of Education, School of Physics and  
Microelectronics, Zhengzhou University, Zhengzhou, 450052, P. R. China.

<sup>b</sup>State Key Laboratory of Biobased Material and Green Papermaking; Shandong  
Provincial Key Laboratory of Microbial Engineering, Department of Bioengineering,  
Qilu University of Technology (Shandong Academy of Sciences), Jinan, 250353, P. R.  
China

<sup>c</sup>College of Physics and Electrical Engineering, Anyang Normal University, Anyang,  
Henan 455000, PR China

<sup>d</sup>Institute of Functional Nano & Soft Materials (FUNSOM), Soochow University,  
Suzhou, Jiangsu 215123, China

E-mail: wudi1205@zzu.edu.cn, lixj@zzu.edu.cn

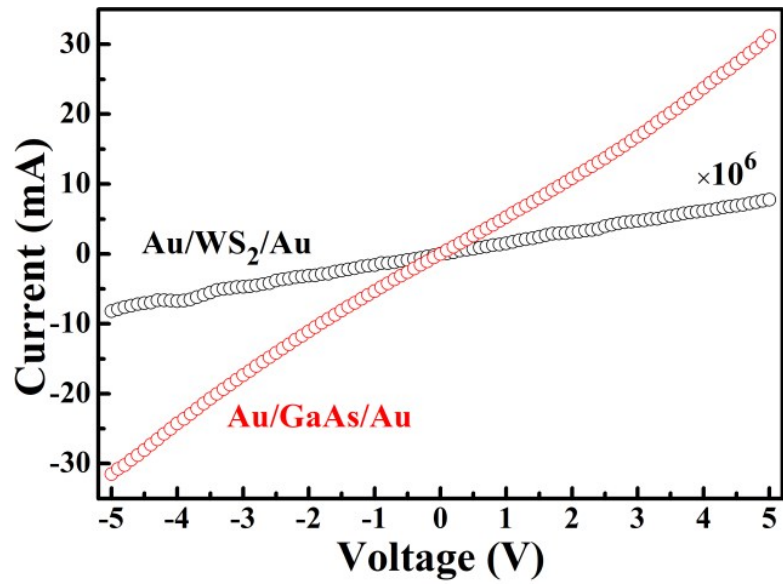

**Fig. S1** The  $I$ - $V$  curves of the GaAs and WS<sub>2</sub> film with Au electrodes, indicating reliable Ohmic contacts with typical linear electric transport behaviors.

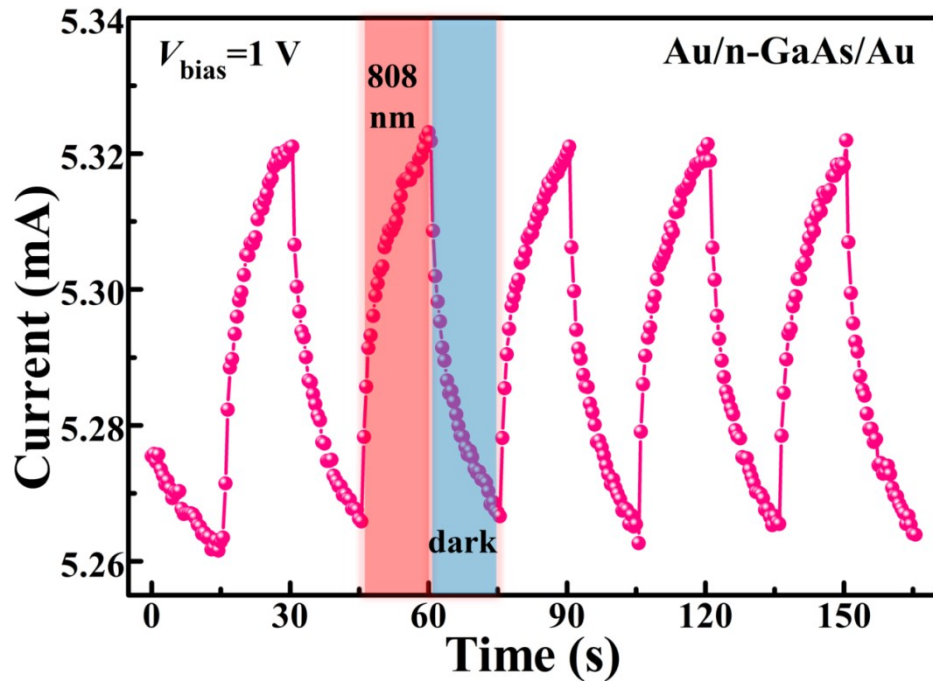

Fig. S2 The photoresponse property of GaAs to the light of 808 nm.

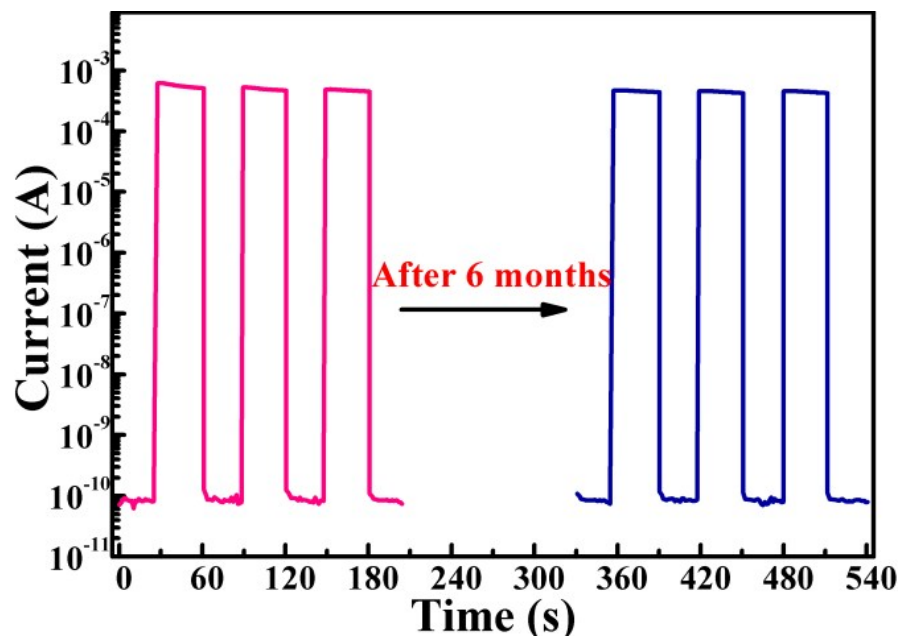

**Fig. S3** Stability of the device with real-time response before (pink) and after (blue) air-storage for six months.

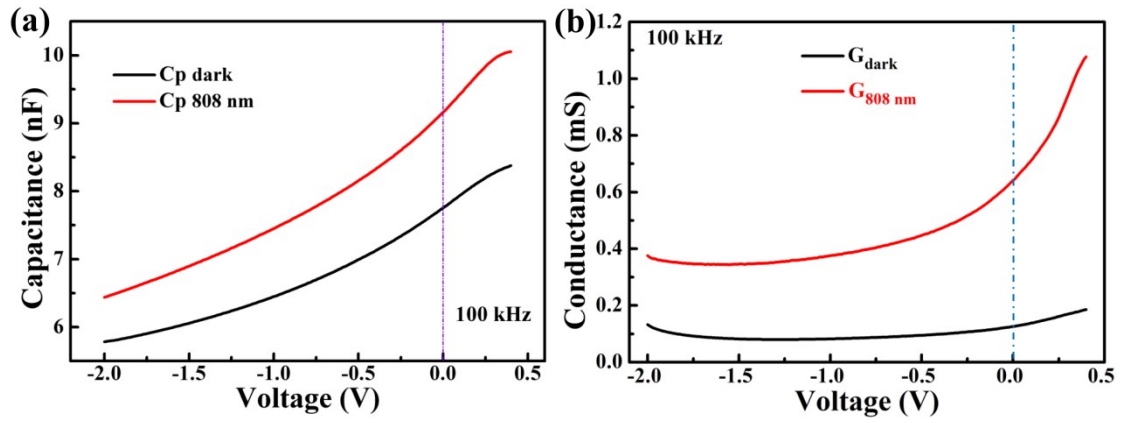

**Fig. S4** (a) and (b) The Capacitance and Conductance of the WS<sub>2</sub>/GaAs heterojunction as a function of bias voltage under 808 nm illumination and dark condition, respectively. Test frequency is 100 kHz.

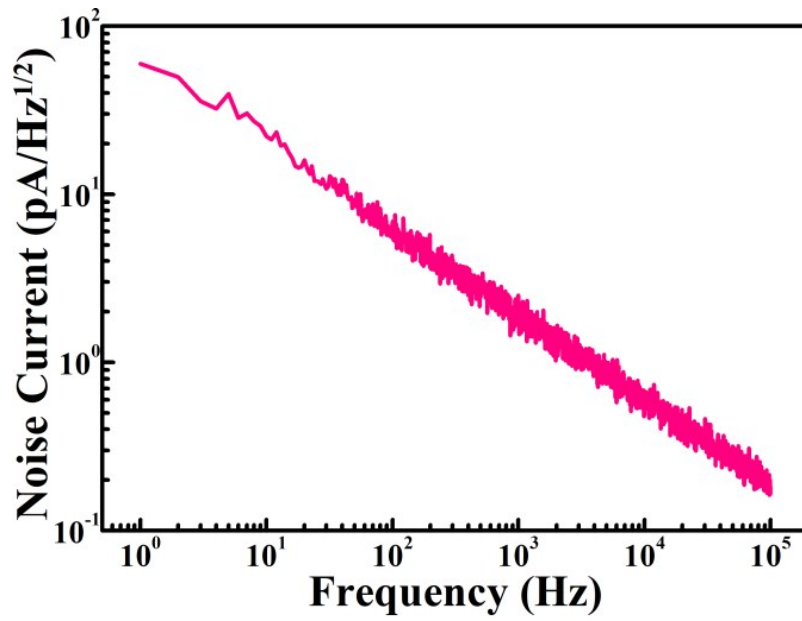

**Fig. S5** Spectra of current noise power density of the WS<sub>2</sub>/GaAs heterojunction device at 0 bias. The noise current at the bandwidth of 1 Hz in the dark is 59.7 pA.
